# Supplementary material for: Highly Specific and Rapid Detection of Hepatitis C Virus Using RT-LAMP-Coupled CRISPR–Cas12 Assay
Source: MDPI journal article supplement (doi:10.3390/diagnostics12071524), 2022-06-23
Supplement: s1 [file s1]

Supplementary Materials

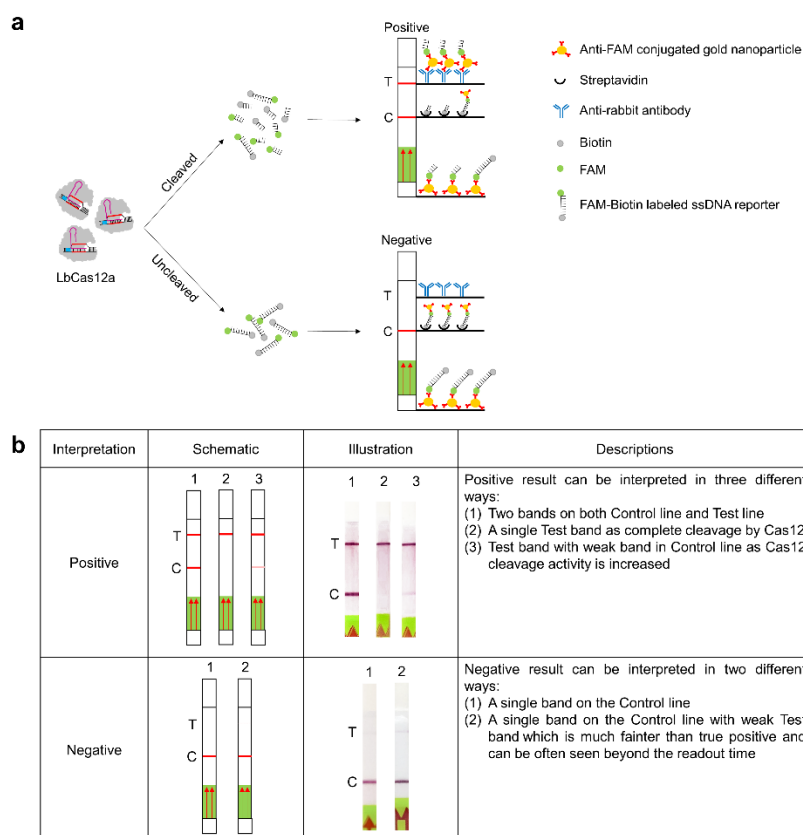

**Figure S1.** Interpretation of results for CRISPR-Cas12 assay with lateral flow-based readout. (a) Illustration of the principle of lateral flow assay. After recognition of the target sequence by Cas12, the ssDNA reporters labeling with carboxyfluorescein (FAM) and biotin were cleaved. Then, the cleaved-FAM binds to anti-FAM conjugated with a gold nanoparticle on the sample pad. After flow-ing through the strip, the cleaved-biotin is captured by streptavidin on the Control line and anti-FAM is captured by anti-rabbit antibody present on the Test line. This can be interpreted as a positive result. In a negative result, there is no cleavage of the reporter by Cas12. Therefore, biotin on an intact reporter is captured by streptavidin on the Control line; (b) Result interpretation of the RT-LAMP-coupled CRISPR-Cas12 assay combining with a lateral flow-based readout. T, Test line; C, Control line.

| HCV viral load (Log <sub>10</sub> IU/mL) | CRISPR-Cas12 assay with lateral flow-based readout                                   |
|------------------------------------------|--------------------------------------------------------------------------------------|
| 7.01-8.00                                | 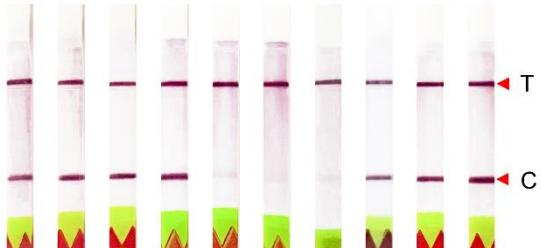   |
| 6.01-7.00                                |    |
| 5.01-6.00                                |   |
| 4.01-5.00                                |  |
| 3.01-4.00                                |   |

Figure S2. Evaluation of CRISPR-Cas12 assay with lateral flow-based readout according to HCV viral loads. T, Test line; C, Control line.
